# Supplementary material for: Human agency beliefs influence behaviour during virtual social interactions
Source: PeerJ journal article supplement (doi:10.7717/peerj.3819), 2017-09-20
Supplement: Supplementary_Material_1_-_Instructions.pdf [file Supplementary_Material_1_-_Instructions.pdf]

## Supplementary Material 1.

Task instructions cards.

# The Burglar Task

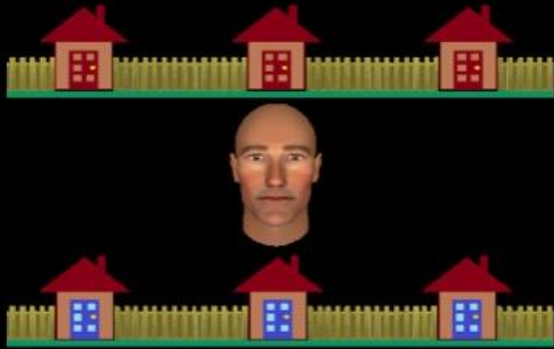

..... A burglar is hiding inside one of these houses.  
Help save the neighbourhood by working with your partner to catch him!

1

Your partner will be located in this laboratory.



2

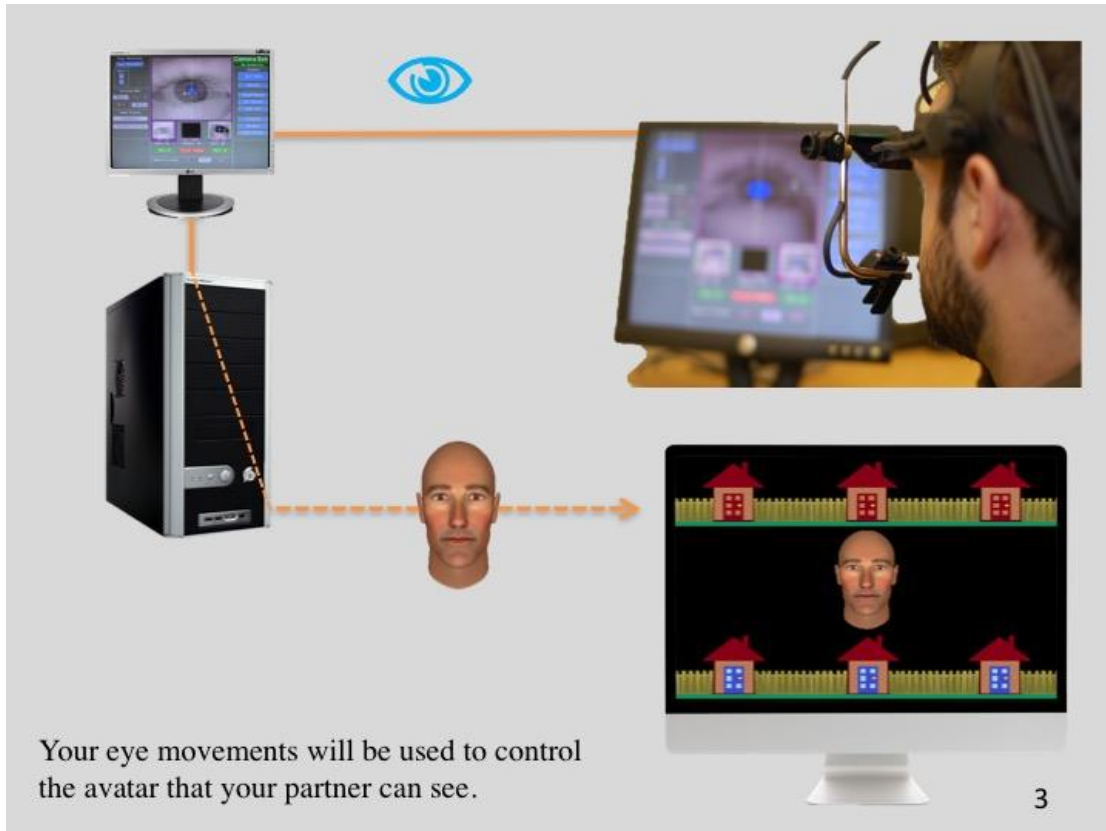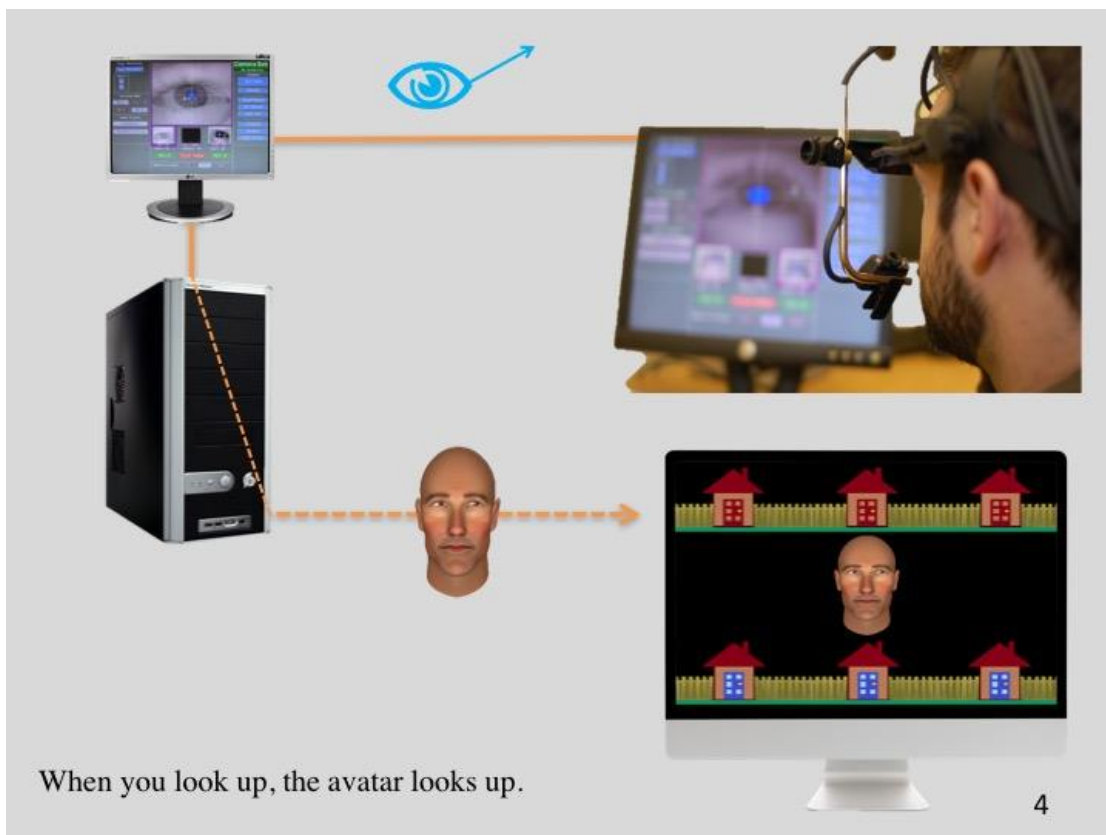

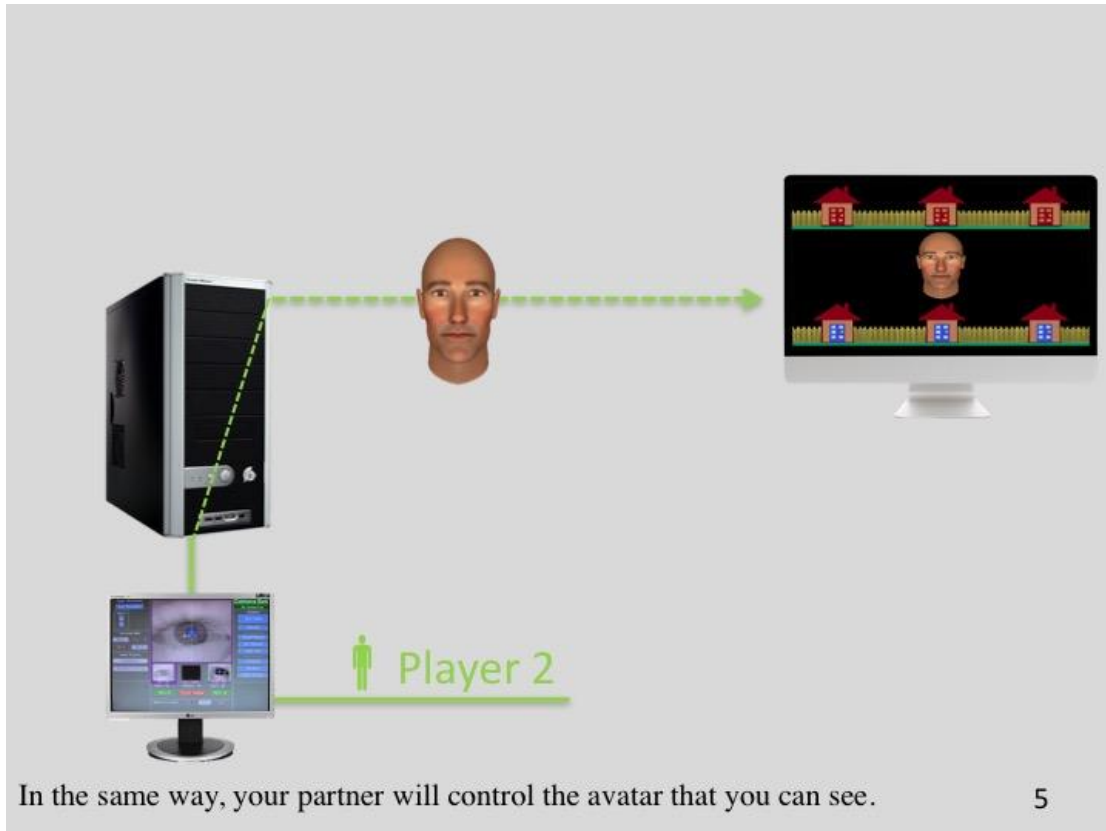

5

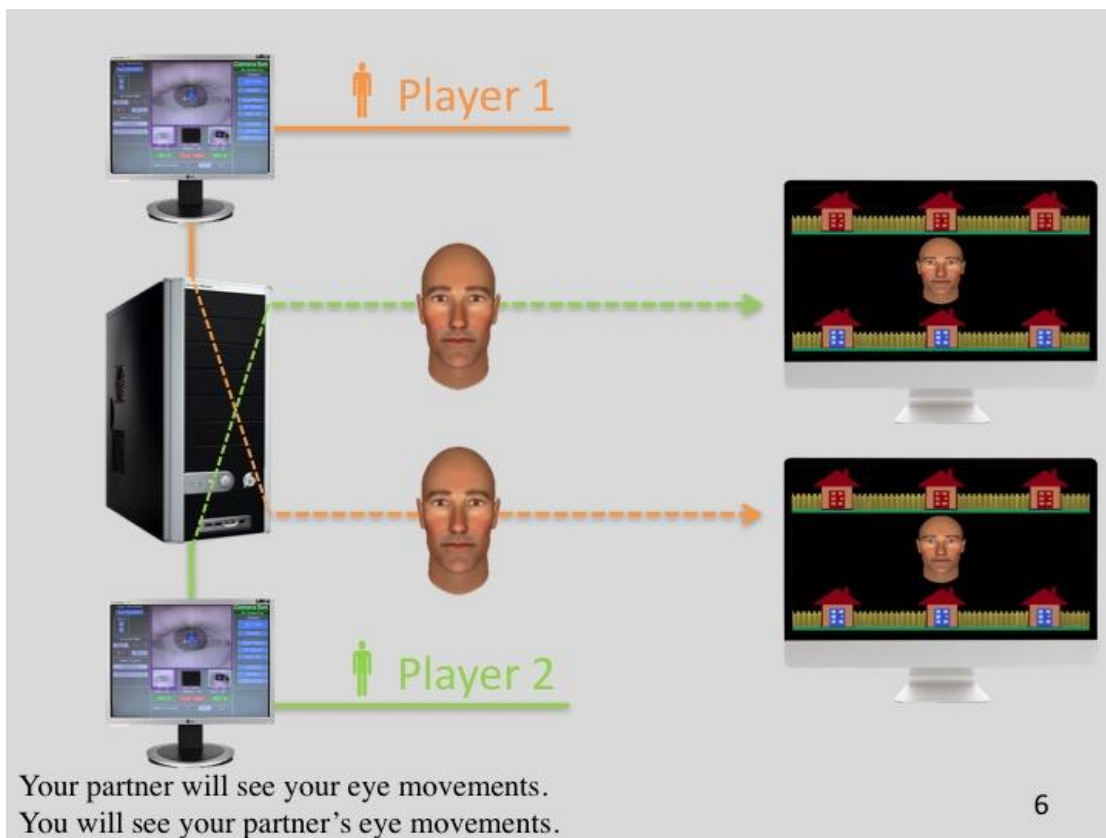

6

You can only search the houses with the blue doors.  
Your partner can only search the other houses.  
On some blocks, **your houses** will be at the bottom

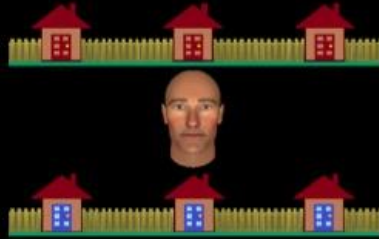

On other blocks, **your houses** will be at the top

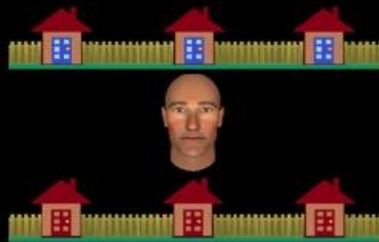

Simply look at a house that you want to search

7

When you look at one of your houses, the door will open.

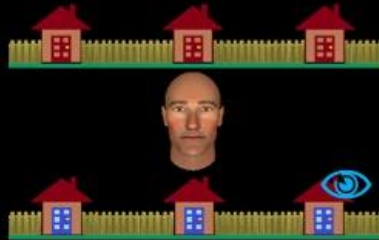

Inside you will find the burglar..... or an empty house

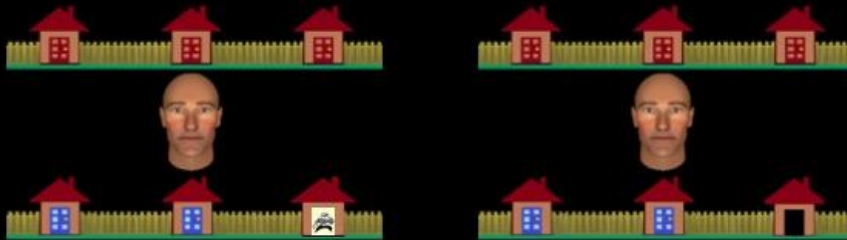

8

Sometimes all your houses will empty.

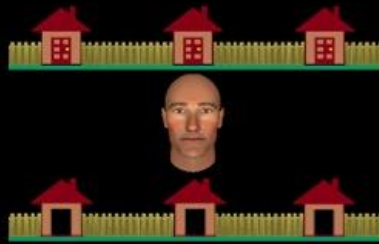

This means the burglar is hiding in one of your partner's houses.  
Your partner will show you where the burglar is.  
You must look in the correct location to catch the burglar.

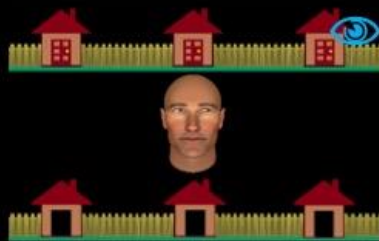

9

Sometimes you **will** find the burglar.

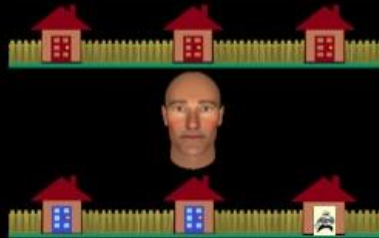

You must then show your partner where the burglar is.  
Then they can help you catch the burglar.

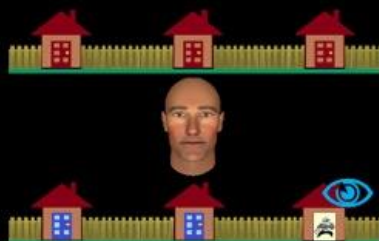

10



You and your partner will also complete the same task on your own.  
The virtual interface will be turned off. So the avatar's eyes will close.

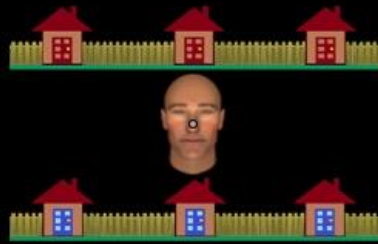

**If you don't find the burglar.**

1. Look at the dot
2. Then an arrow will guide you

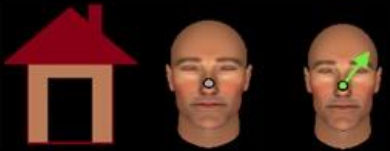

**If you DO find the burglar.**

1. Look at the dot
2. Wait for the dot to turn green
3. Look back at the burglar's location

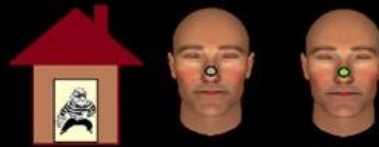

11

When you catch the burglar, he will appear behind bars.

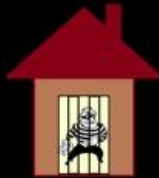

When the burglar escapes, he will appear in red.

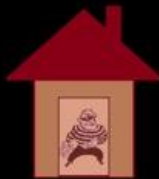

If you do not complete your search, you will see this text.

**FAILED**

**SEARCH**

12
